# Supplementary material
Source: PubMed Central journal article supplement (PMC3815519)
Supplement: NIHMS504402-supplement-01.pdf [file NIHMS504402-supplement-01.pdf]

## Supplemental Materials

**Table 1. Contingency tables for significant SNP-SNP interactions.**

|                  |          | <b>rs178051</b> |          | <b>Total</b> |
|------------------|----------|-----------------|----------|--------------|
|                  |          | <i>T</i>        | <i>C</i> |              |
| <b>rs9295289</b> | <i>T</i> | 552             | 107      | 659          |
|                  | <i>C</i> | 61              | 9        | 70           |
| <b>Total</b>     |          | 613             | 116      | 729          |

|                   |          | <b>rs3744566</b> |          | <b>Total</b> |
|-------------------|----------|------------------|----------|--------------|
|                   |          | <i>C</i>         | <i>T</i> |              |
| <b>rs11596284</b> | <i>A</i> | 557              | 98       | 655          |
|                   | <i>C</i> | 63               | 10       | 73           |
| <b>Total</b>      |          | 620              | 108      | 728          |

|                   |          | <b>rs7154732</b> |          | <b>Total</b> |
|-------------------|----------|------------------|----------|--------------|
|                   |          | <i>T</i>         | <i>C</i> |              |
| <b>rs11614805</b> | <i>C</i> | 579              | 60       | 639          |
|                   | <i>T</i> | 81               | 5        | 86           |
| <b>Total</b>      |          | 660              | 65       | 725          |

|                   |          | <b>rs1922127</b> |          | <b>Total</b> |
|-------------------|----------|------------------|----------|--------------|
|                   |          | <i>G</i>         | <i>A</i> |              |
| <b>rs11590865</b> | <i>A</i> | 460              | 194      | 654          |
|                   | <i>G</i> | 56               | 18       | 74           |
| <b>Total</b>      |          | 516              | 212      | 728          |
